# Supplementary material for: An Essential Infinitebook for Plastic and Reconstructive Surgery Preoperative Planning
Source: PubMed Central journal article supplement — Plast Reconstr Surg Glob Open. 2024 Dec 6;12(12):e6382. doi: 10.1097/GOX.0000000000006382 (PMC11623840; doi:10.1097/gox.0000000000006382), 2024-12-06
Supplement: gox-12-e6382-s002.pdf [file gox-12-e6382-s002.pdf]

# Questionnaire on the level of understanding of the surgical procedure and level of satisfaction with the preoperative consultation

**Age:**

**Sex:** Female  Male

**Level of education:**

**Professional activity:**

Please take five minutes of your time to fill out this form.

Please answer all questions. Mark with an X the answer that best suits you.

|                                                                      | Very Good                | Good                     | Satisfactory             | Bad                      | Very Bad                 |
|----------------------------------------------------------------------|--------------------------|--------------------------|--------------------------|--------------------------|--------------------------|
| Appointment length                                                   | <input type="checkbox"/> |
| Length of the explanation about the surgical procedure               | <input type="checkbox"/> |
| Surgeon's care                                                       | <input type="checkbox"/> |
| Surgeon's knowledge                                                  | <input type="checkbox"/> |
| Doctor's communication skills                                        | <input type="checkbox"/> |
| Surgeon availability to clarify and explain                          | <input type="checkbox"/> |
| Ability to give understandable explanations (clarity of information) | <input type="checkbox"/> |
| Satisfaction with the preoperative consultation                      | <input type="checkbox"/> |

1. Have you ever had any surgery?

Yes

No

If so, which one(s)? \_\_\_\_\_

2. Do you have any known illness(es)?

Yes

No

If so, which one(s)? \_\_\_\_\_

3. Are you aware that any plastic and reconstructive surgery has associated risks?

- Yes, there are several risks
- Yes, the risk is similar to that in other surgical areas
- There are no associated risks
- I don't know

4. What surgery(ies) will you undergo?

- Abdominoplasty
- Liposuction
- Thigh *lift* (cruroplasty)
- Arm *lift* (brachioplasty)
- Otoplasty
- Rhinoplasty
- Upper blepharoplasty
- Inferior blepharoplasty
- Face *lift*
- Breast reduction/mastopexy
- Breast augmentation
- Expander-implant breast reconstruction
- Latissimus dorsi* flap breast reconstruction
- DIEP flap microsurgical breast reconstruction (*deep inferior epigastric perforator free flap*)
- TRAM flap breast reconstruction (*transverse rectus abdominus muscle flap*)
- Nipple-areolar complex (NAC) reconstruction

5. Please state your level of expectation regarding the surgery

- Very High
- High
- Neutral
- Low
- Very Low

6. Were you satisfied with the explanation provided by the surgeon?

- I am satisfied
- I need more information

7. Do you know and understand the technique(s) used in your surgery?
- Yes
- No
8. Do you consider that after your surgery you will have scar marks?
- Yes
- No
- I don't know
9. Do you know what/how/where the incision/mark(s) associated with your surgery will be?
- Yes
- No
10. Do you know the location and size of the incision/scar?
- Yes
- No
11. Would you recommend the InfiniteBook and preoperative kit assisted explanation?
- Yes
- No

**The questionnaire ends here. Thank you for your time.**
