# Supplementary material for: An Essential Infinitebook for Plastic and Reconstructive Surgery Preoperative Planning
Source: PubMed Central journal article supplement — Plast Reconstr Surg Glob Open. 2024 Dec 6;12(12):e6382. doi: 10.1097/GOX.0000000000006382 (PMC11623840; doi:10.1097/gox.0000000000006382), 2024-12-06
Supplement: gox-12-e6382-s003.pdf [file gox-12-e6382-s003.pdf]

## Supplementary Digital Content 1

A graph that shows participants' professional activity. A – Control Group; B – Infinitebook Group

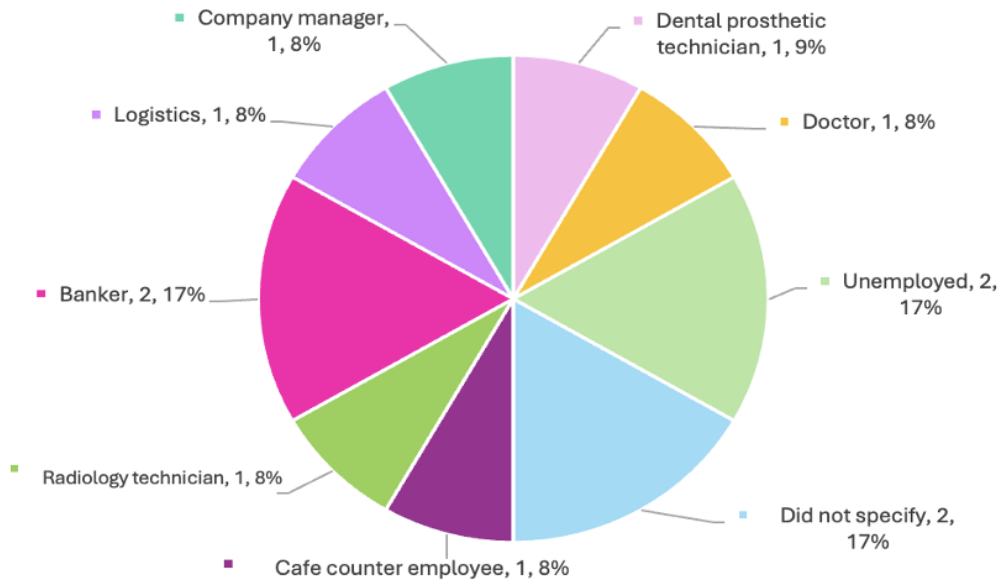

**A**

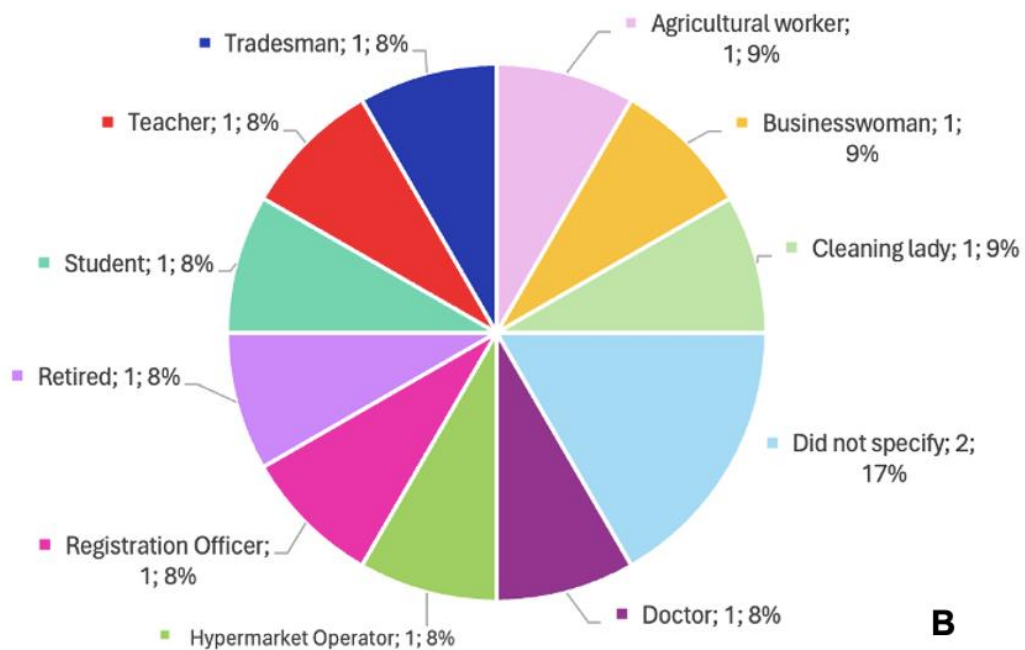

**B**
